# Supplementary material for: Deubiquitinase YOD1 suppresses tumor progression by stabilizing E3 ligase TRIM33 in head and neck squamous cell carcinoma
Source: PubMed Central journal article supplement (PMC10423255; doi:10.1038/s41419-023-06035-0), 2023-08-12

Figure1-G

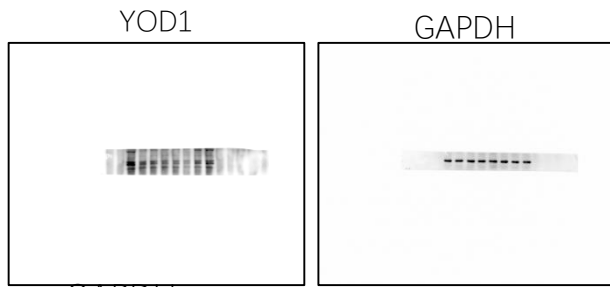

Figure2-A

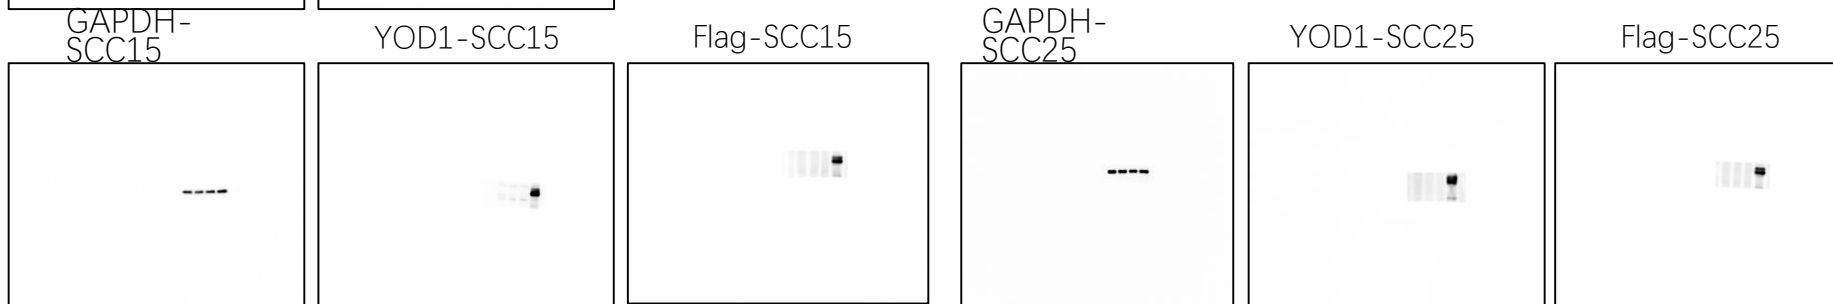

Figure2-E

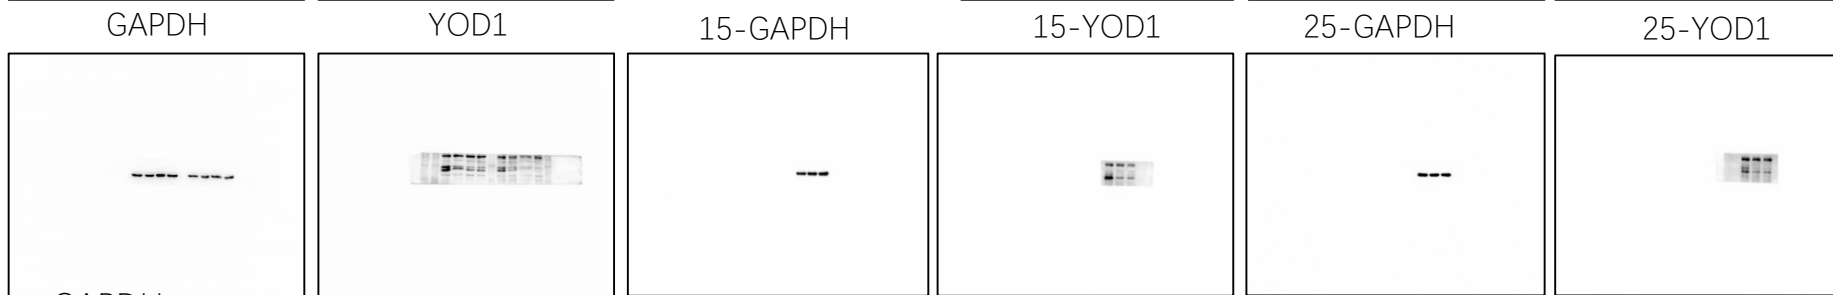

Figure3-E

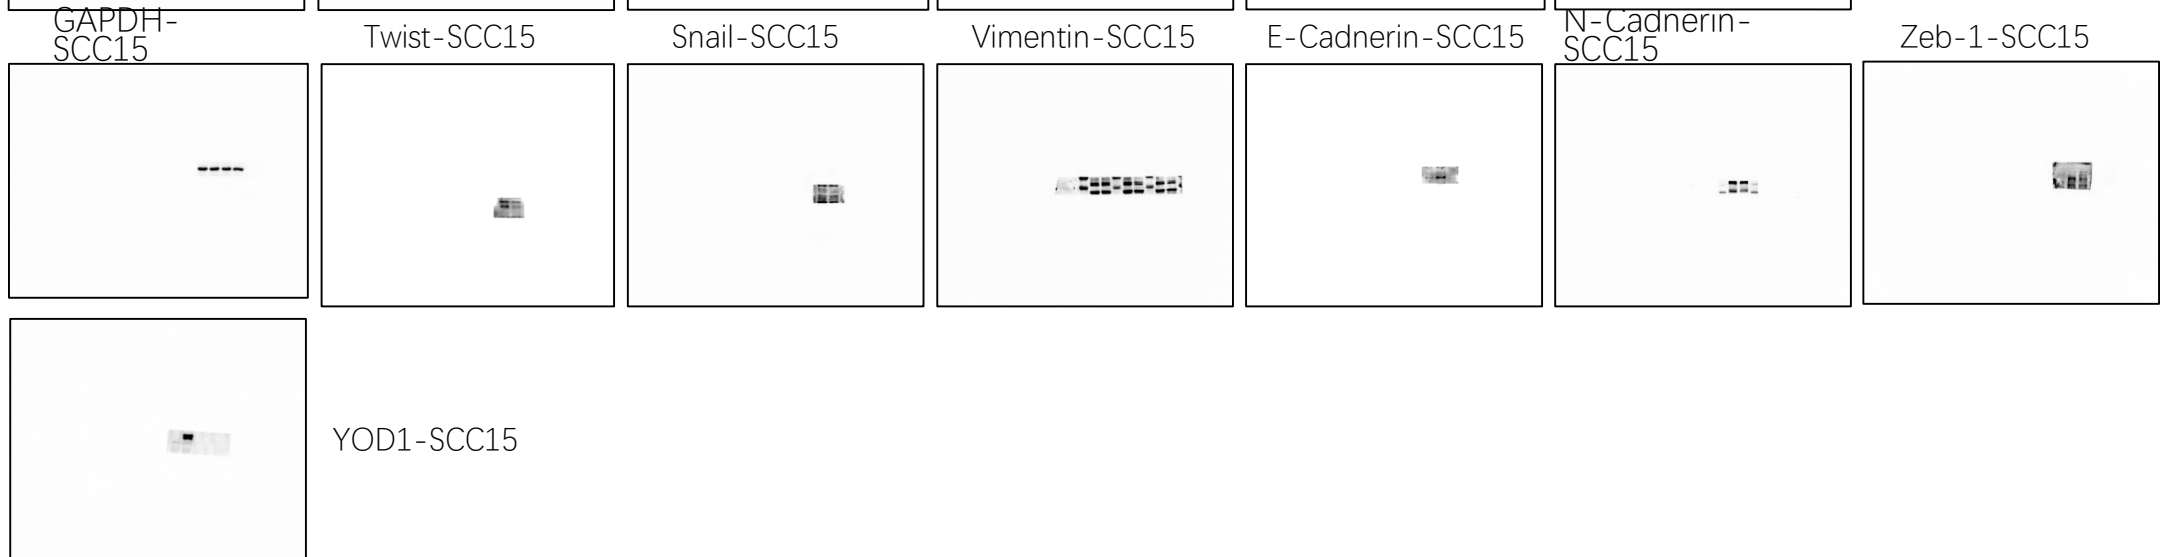

Figure3-E

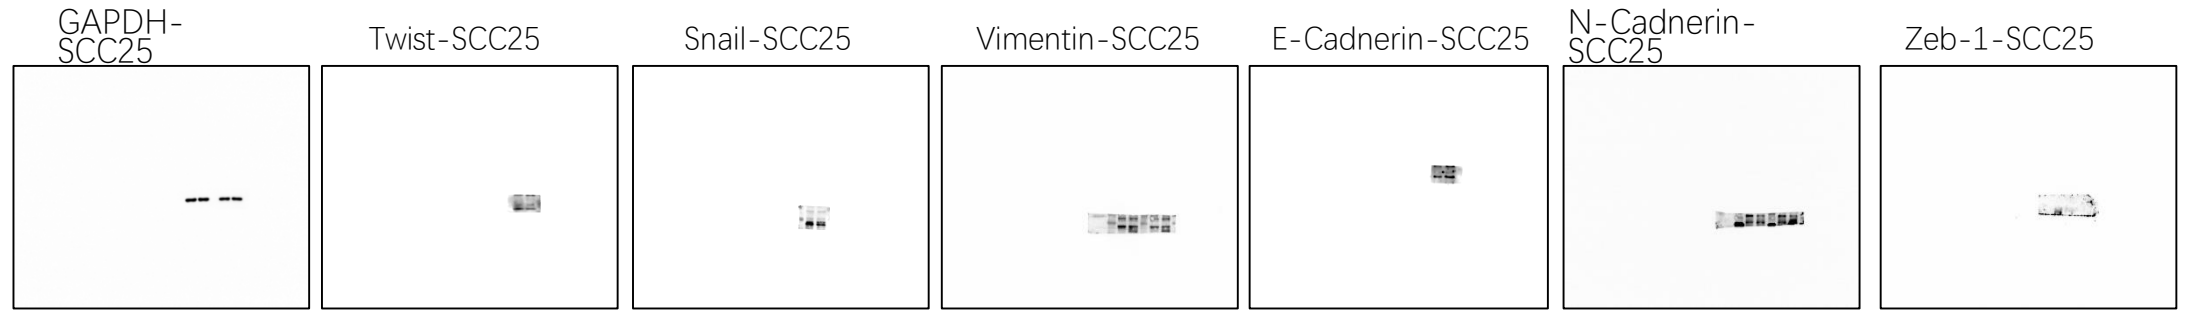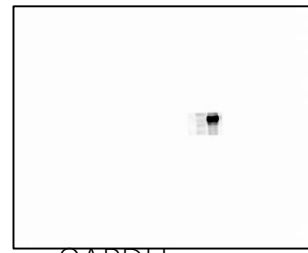

YOD1-SCC25

Figure3-F

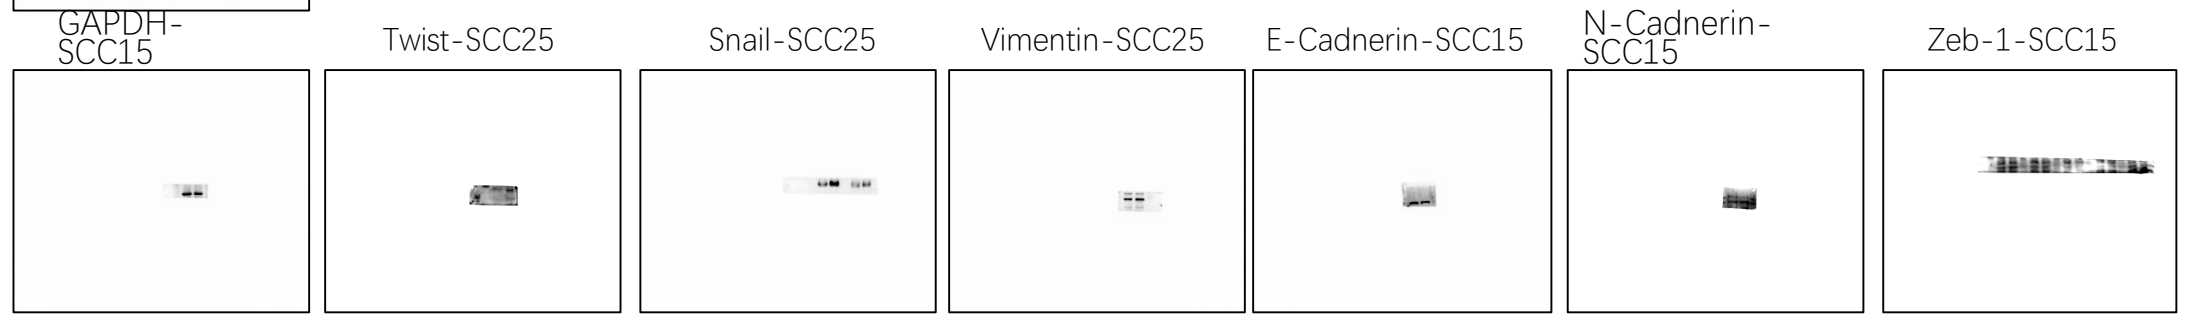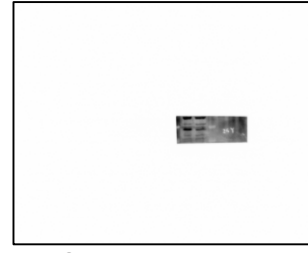

YOD1-SCC15

Figure3-F

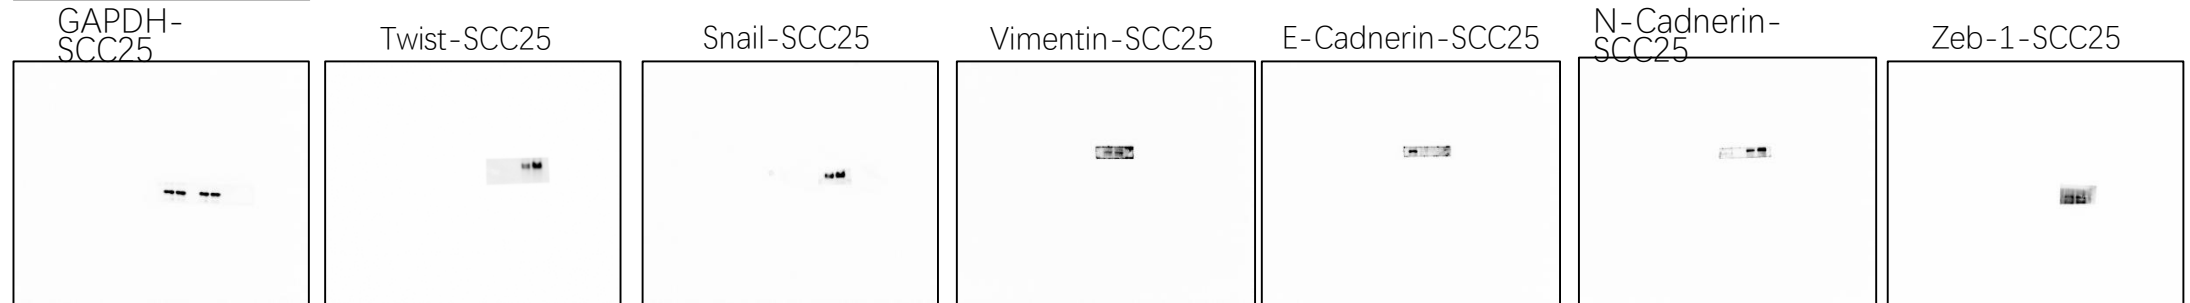

Figure3-F

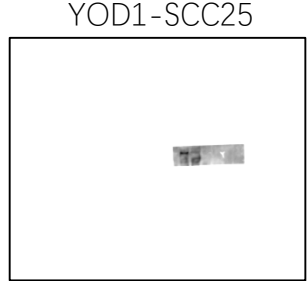

Figure4-B

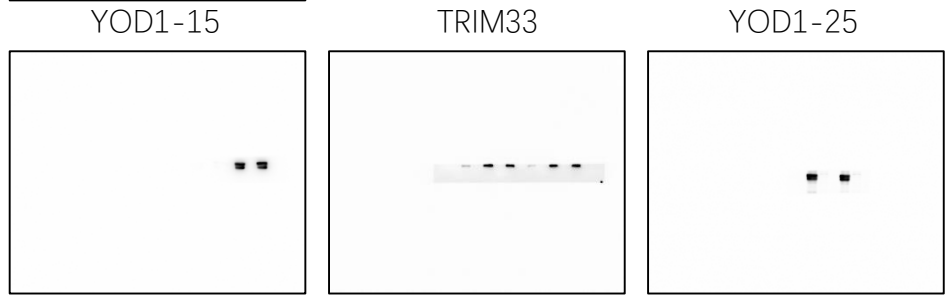

Figure4-D

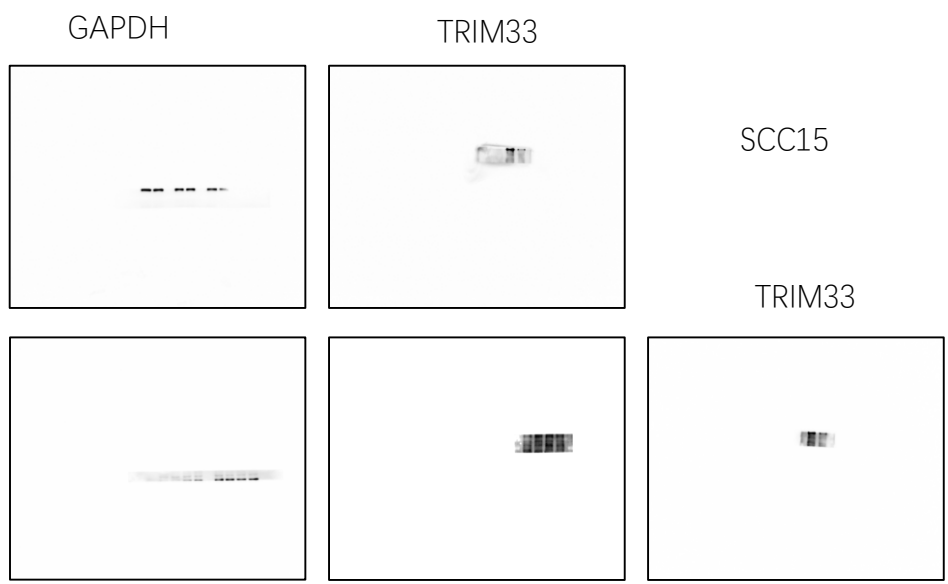

Figure4-E

SCC15

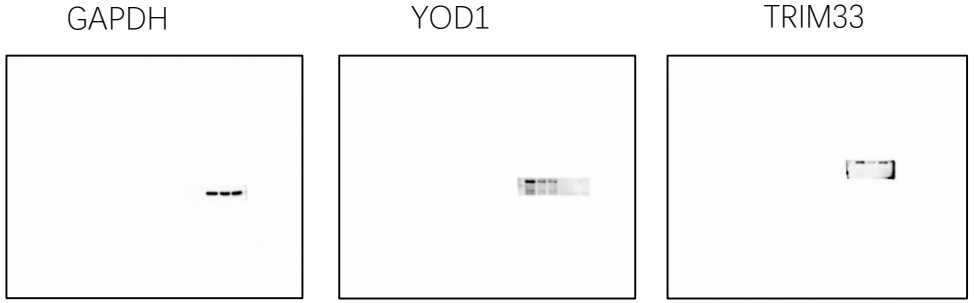

SCC25

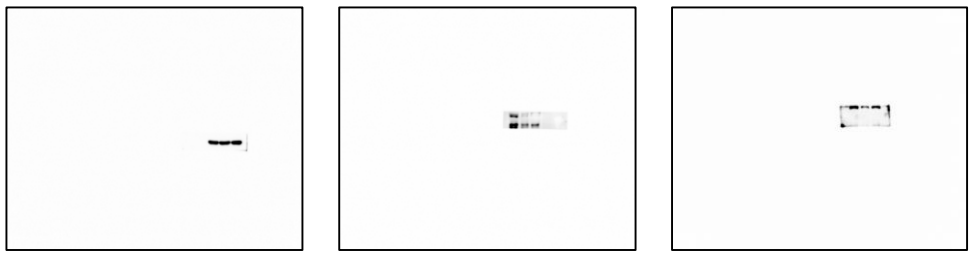

Figure4-F

SCC25

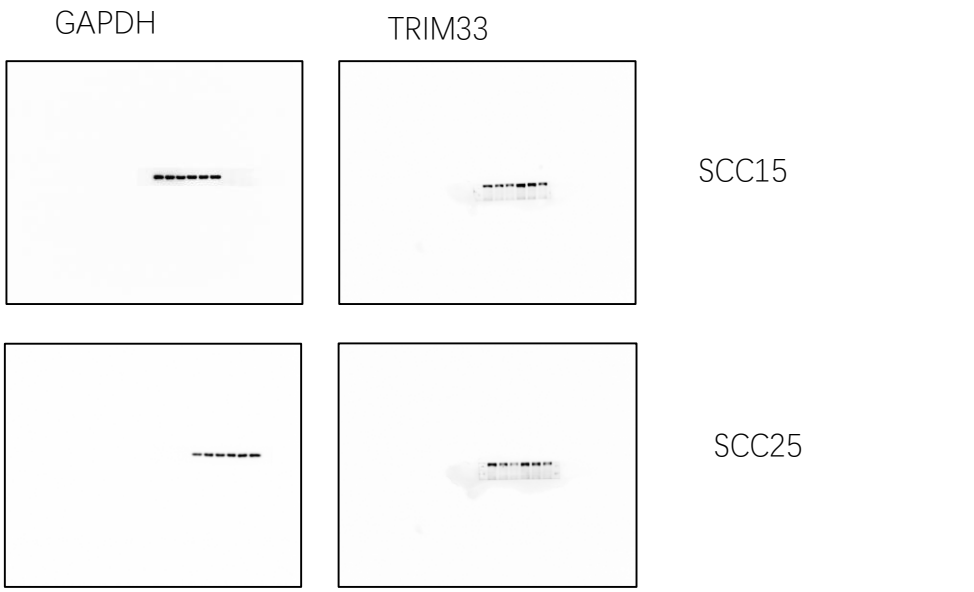

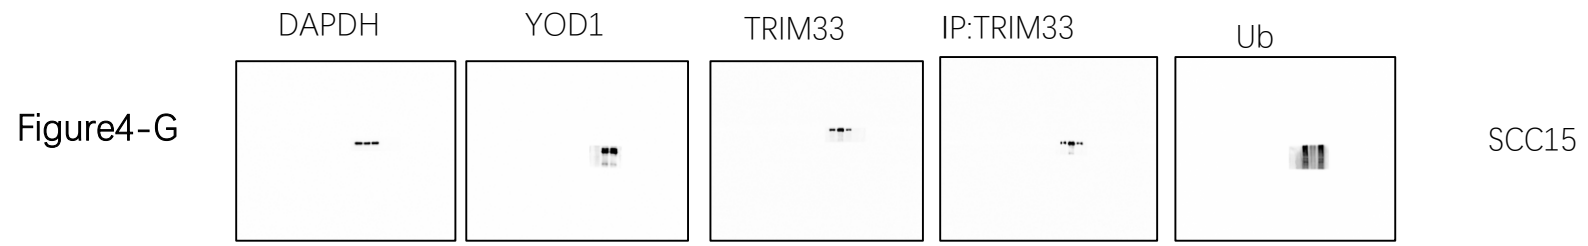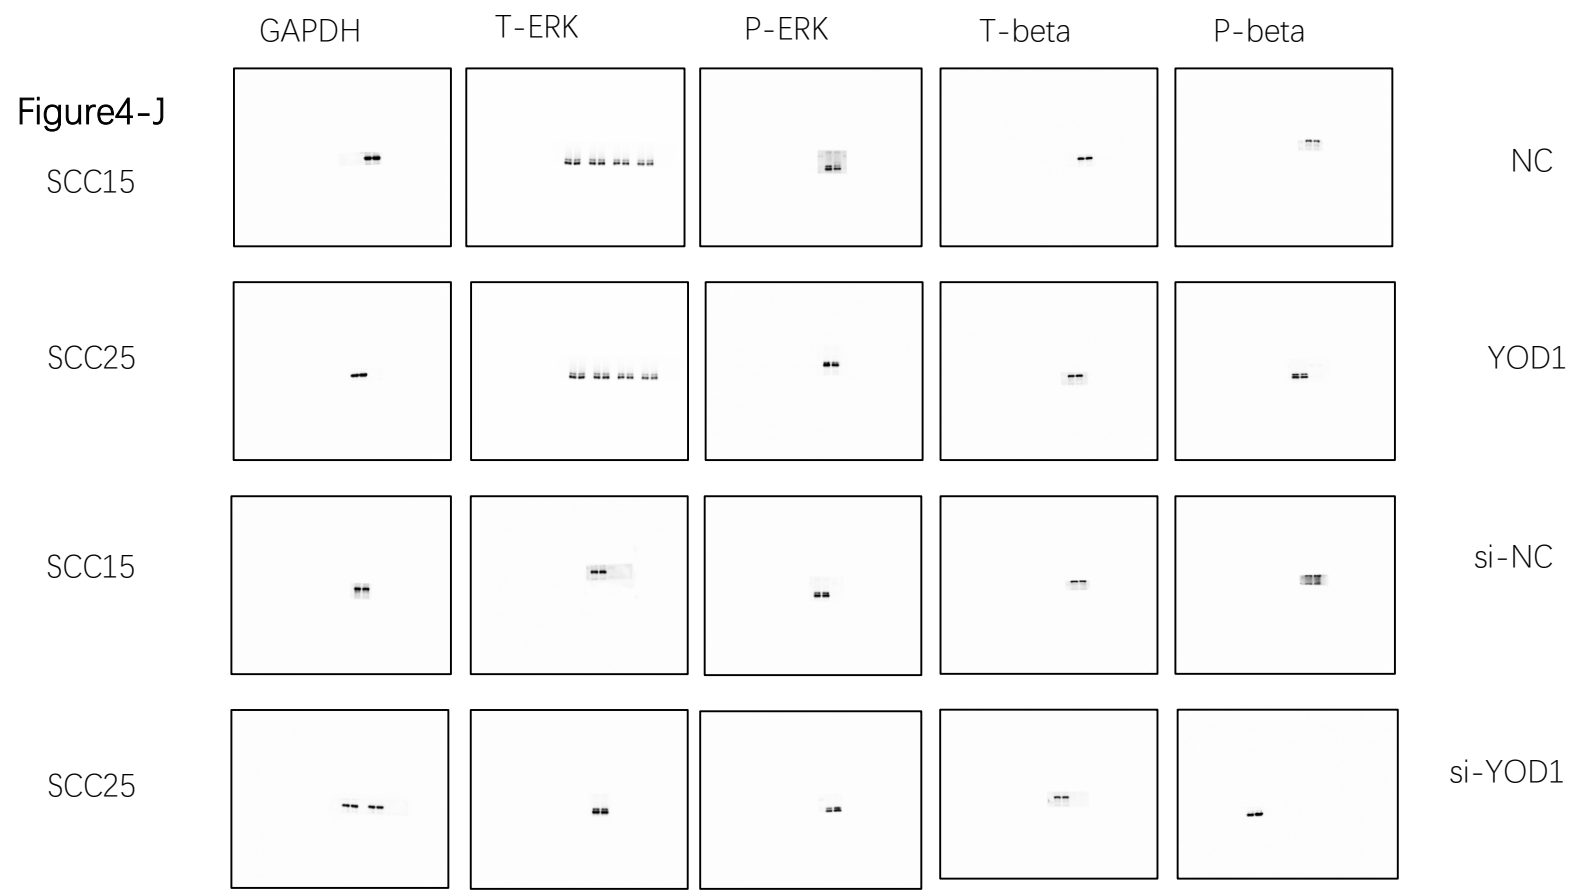

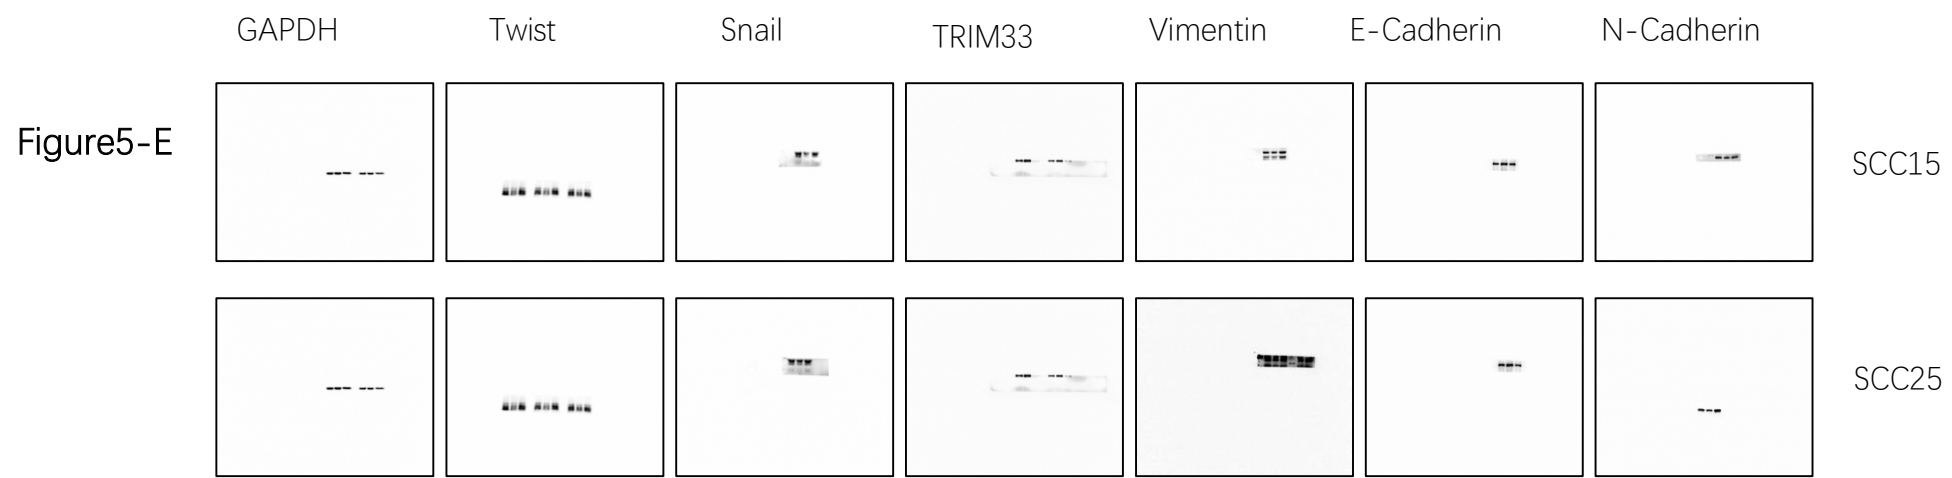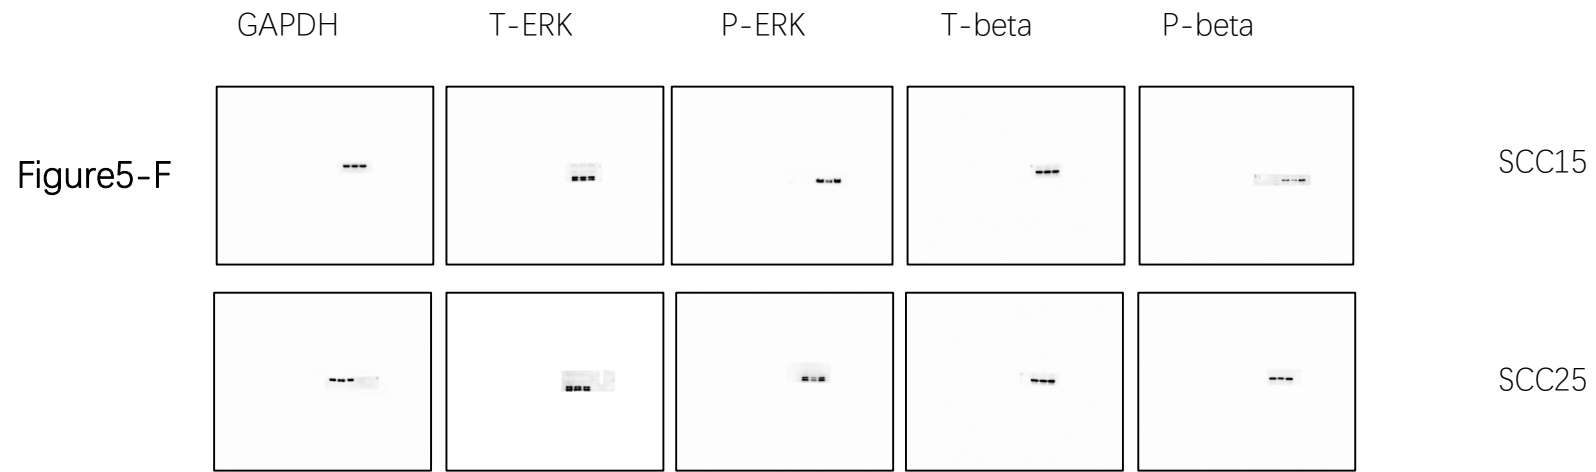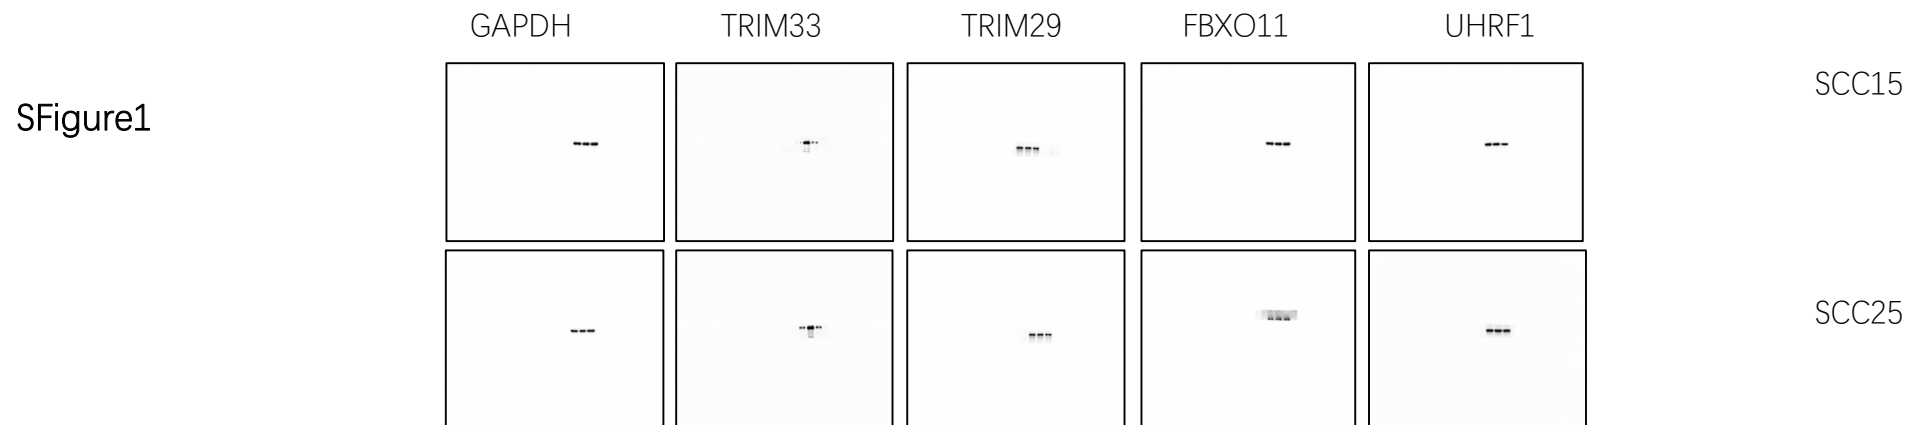

Supplement: 41419_2023_6035_MOESM2_ESM.pdf [file 41419_2023_6035_MOESM2_ESM.pdf]
